# Supplementary material
Source: MDPI journal article supplement (https://www.mdpi.com/2673-4184/1/2/7)
Supplement: s1 [file s1]

**Table S1.** Anthropometric characteristics.

| <b>Basic characteristics</b> | <b>All<br/>(n=18)</b> |       | <b>DYS group<br/>(n=9)</b> |          | <b>CYC group<br/>(n=9)</b> |        | <b>p value</b> |  |
|------------------------------|-----------------------|-------|----------------------------|----------|----------------------------|--------|----------------|--|
| Age (years)                  | 20.3                  | ± 1.1 | 19.9                       | ± 1.1    | 20.7                       | ± 1.0  | 0.136          |  |
| Height (cm)                  | 163.0                 | ± 6.2 | 164.3                      | ± 7.7    | 161.7                      | ± 4.4  | 0.297          |  |
| Body weight (kg)             | 58.5                  | ± 9.0 | 58.6                       | ± 7.8    | 58.3                       | ± 10.5 | 0.730          |  |
| Age of menarche (years)      | 13.6                  | ± 1.2 | 13.7                       | ± 1.3    | 13.4                       | ± 1.1  | 0.796          |  |
| 1-RM (kg)                    | 79.7                  | ± 9.9 | 76.7                       | ± 10.2   | 82.8                       | ± 9.1  | 0.267          |  |
| Menstrual cycle (days)       |                       |       | 79.6                       | ± 13.3 * | 31.0                       | ± 1.9  | <0.01          |  |

Data shown as means±SDs, \* $p < 0.05$  between DYS group and CYC group.

**Table S2.** Hormone and tendon stiffness data for each week and group in Exercise condition.

|                               |                             | <b>Week 1</b>            | <b>Week 2</b>              | <b>Week 3</b>          |
|-------------------------------|-----------------------------|--------------------------|----------------------------|------------------------|
| <b>CYC Group</b>              |                             |                          |                            |                        |
| <b>Hormone Level</b>          |                             |                          |                            |                        |
|                               | <b>Estrogen (pg/mL)</b>     | 62.2 ± 42.4 <sup>b</sup> | 215.4 ± 145.5 <sup>a</sup> | 136.4 ± 69.7           |
|                               | <b>Progesterone (pg/L)</b>  | 1.3 ± 0.5 <sup>c</sup>   | 2.8 ± 2.7                  | 9.0 ± 5.7 <sup>a</sup> |
| <b>Tendon Stiffness (kPa)</b> |                             |                          |                            |                        |
|                               | <b>Pre</b>                  | 24.6 ± 17.3              | 30.3 ± 10.0                | 21.9 ± 11.8            |
|                               | <b>Post</b>                 | 27.7 ± 14.4              | 33.1 ± 15.2                | 29.4 ± 14.7            |
|                               | <b>Post 24H</b>             | 36.1 ± 17.6              | 36.3 ± 16.5                | 35.3 ± 13.3            |
| <b>DYS Group</b>              |                             |                          |                            |                        |
| <b>Hormone Level</b>          |                             |                          |                            |                        |
|                               | <b>Estrogen (pg/mL)</b>     | 35.5 ± 15.2              | 44.6 ± 21.3                | 36.4 ± 12.0            |
|                               | <b>Progesterone (pg/mL)</b> | 1.1 ± 0.2                | 1.3 ± 0.7                  | 1.2 ± 0.3              |
| <b>Tendon Stiffness (kPa)</b> |                             |                          |                            |                        |
|                               | <b>Pre</b>                  | 24.9 ± 11.6              | 27.7 ± 9.3                 | 26.6 ± 5.7             |
|                               | <b>Post</b>                 | 24.6 ± 13.0              | 40.2 ± 18.6                | 30.7 ± 9.8             |
|                               | <b>Post 24H</b>             | 48.3 ± 18.9 *            | 48.9 ± 25.0 *              | 44.2 ± 13.3 *          |

Data shown as means±SDs.  $p < 0.05$  in each hormone level in Week 1 are shown as a, in Week 2 are shown as b, and in Week 3 are shown as c in exercise condition.  $p < 0.05$  vs. Pre is shown as \* in tendon stiffness.
